# Supplementary material for: Identification of a unique, de novo MYCBP2 variant in an individual with highly superior autobiographical memory
Source: bioRxiv or medRxiv preprint supplement (doi:10.1101/2024.12.18.24319147), 2024-12-20
Supplement: Supplementary file [file media-7.pdf]

## Supplementary Figure 1

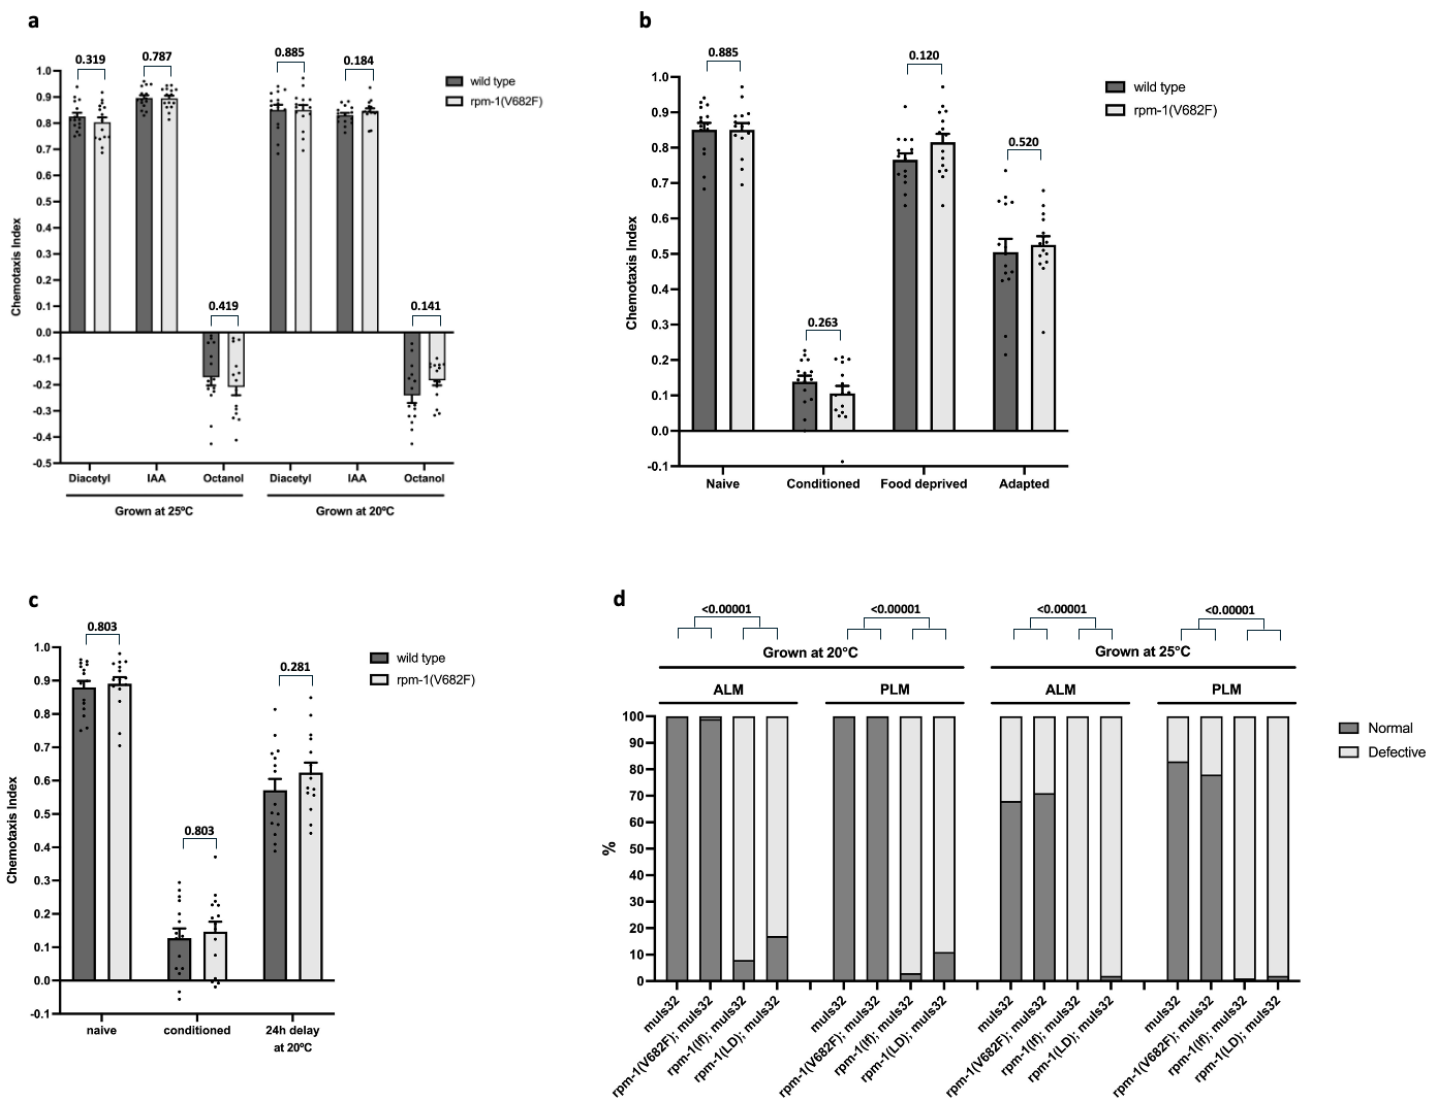

1 **Supplementary Fig. 1 | Impact of the mutated residue on sensory, behavioral, and axonal**  
2 **measurements in *C. elegans*.** **a**, Chemotaxis of naïve adult N2 WT and *rpm-1* mutant worms  
3 (*rpm-1(V682F)*) towards two volatile attractants (diacytyl (DA), isoamyl alcohol (IAA)) and a  
4 repellent (octanol) under two different growth conditions (i.e., 25°C and 20°C). Dots  
5 represent single plates. **b**, Chemotaxis of adult N2 WT and *rpm-1* mutant worms (*rpm-*  
6 *1(V682F)*) towards DA under four experimental conditions: naïve (unconditioned),  
7 conditioned (directly after 1h of food deprivation in the presence of DA), food deprived  
8 (worms placed on a plate devoid of both food and DA for a duration of one hour), adapted  
9 (worms placed on a plate containing both food and DA for a duration of one hour). Dots  
10 represent single plates. **c**, Chemotaxis indices towards DA of WT and *rpm-1(V682F)* worms  
11 under three conditions: naïve (unconditioned), conditioned (directly after 1h of food  
12 deprivation in the presence of DA), 24h after conditioning. For the last condition, worms  
13 were kept at 20°C during 24h after conditioning. Dots represent single plates. For bar plots  
14 **a-c**, bars and error bars represent means and s.e.m., respectively. All *P* values related to  
15 these plots are two-sided (non-parametric Wilcoxon-Mann-Whitney test). **d**, Quantification  
16 of axon termination in the anterior lateral mechanosensory (ALM) and posterior lateral  
17 mechanosensory (PLM) neurons utilizing a strain that expresses GFP in these neurons

1 (*muls32 [mec-7p::GFP]*). Worms were grown under two different temperature conditions.  
2 Conventional *rpm-1* loss-of function mutants (*rpm-1(lf)*) and animals harboring variants that  
3 severely affect RPM-1 ubiquitin ligase activity (*rpm-1(LD)*) display severe axon termination  
4 defects. Axon termination in *rpm-1(V682F)* mutants is not impaired under physiological  
5 growing conditions and is comparable to that of N2 animals under conditions known to  
6 affect axon development (worms grown at 25°C). Each bar represents analysis of axon  
7 termination in 100 worms. Light gray bars represent worms that exhibited defective axon  
8 termination. All *P* values related to this plot are two-sided (chi-square test of independence).  
9  
10
